# Supplementary material
Source: PubMed Central journal article supplement (PMC3131911)

# Supplementary Figure 1

A

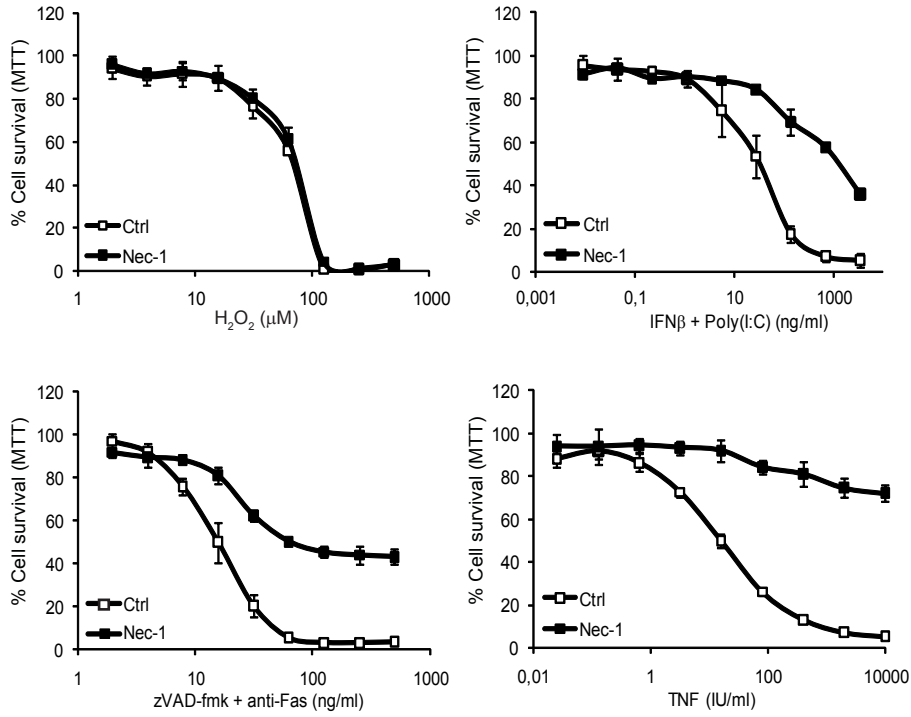

B

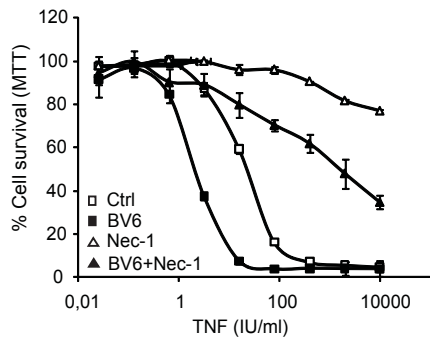

Supplementary Figure 2

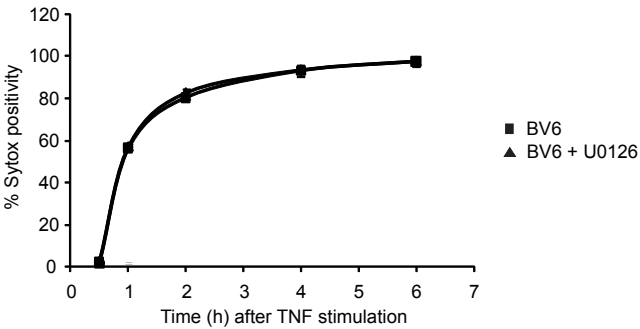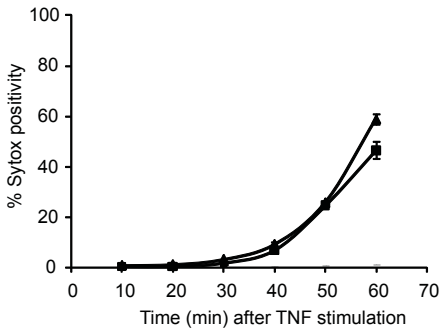

Supplement: cdd2010138x1.pdf [file cdd2010138x1.pdf]
